# Supplementary material
Source: PubMed Central journal article supplement (PMC3308118)
Supplement: NIHMS340653-supplement-1.pdf [file NIHMS340653-supplement-1.pdf]

# APPENDIX I

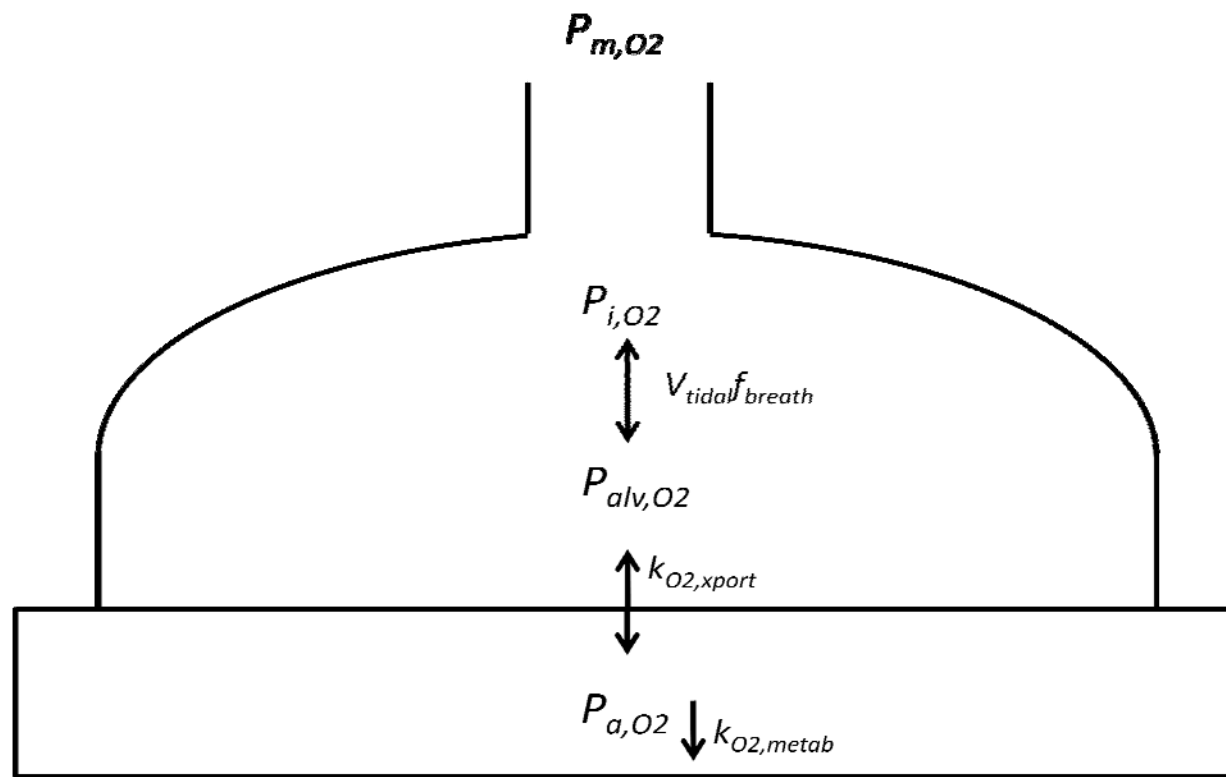

Schematic of gas transfer model

### Steady State Lung Mechanics

$$V_{dead} = 0.2V_{tidal}$$

$$V_{alv} = V_{tidal} - V_{dead}$$

$$P_{i,O_2}^0 = \frac{P_{m,O_2}(V_{tidal} - V_{dead}) + P_{alv,O_2}^0 V_{dead}}{V_{tidal}}$$

$$\dot{V} = V_{tidal} f_{breath}$$

$$k_{O_2,export}^0 = \dot{V} \frac{(P_{i,O_2}^0 - P_{alv,O_2}^0)}{(P_{alv,O_2}^0 - P_{a,O_2}^0)}$$

$$k_{O_2,metab} = k_{O_2,export}^0 \frac{(P_{alv,O_2}^0 - P_{a,O_2}^0)}{P_{a,O_2}^0}$$

### Dynamic Lung Mechanics

$$k_{O_2,export} = 2 \frac{ECR^{h_{EC}}}{1 + ECR^{h_{EC}}} k_{O_2,export}^0$$

$$P_{i,O_2} = \frac{P_{m,O_2}(V_{tidal} - V_{dead}) + P_{alv,O_2} V_{dead}}{V_{tidal}}$$

### Dynamic Lung Mechanics - O<sub>2</sub> Partial Pressures

$$V_{alv} \frac{dP_{alv,O_2}}{dt} = \dot{V}(P_{i,O_2} - P_{alv,O_2}) - k_{O_2,export}(P_{alv,O_2} - P_{a,O_2})$$

$$V_{blood} \frac{dP_{a,O_2}}{dt} = k_{O_2,export}(P_{alv,O_2} - P_{a,O_2}) - k_{O_2,metab} P_{a,O_2}$$

### Steady State Blood Volume

$$V_{blood} = 0.070 \text{ L/kg} * \text{weight}$$

## Dynamic Immune Cell Movement

$$k_{B,L,MA/NA} = k_{B,L,MA/NA}^0 * MA/NA * ECA$$

## Clinical Interventions

### **Fluids**

$$B_{inc,fluid} = \sum_{i=1}^{n \text{ infusions}} \frac{\alpha_{B,fluid}}{\text{infusion duration}_{fluids}} \text{ where } t = [t_{Fon,i}, t_{Foff,i}]$$

### **Ventilators**

$$P_{m,O_2} = 760mmHg * F_{i,O_2}$$

$F_{i,O_2}$  is determined by the ventilator setting

## Mean Arterial Pressure

$$\frac{dB}{dt} = B_{inc,fluid}(1 - B) + k_B \left( \frac{1}{1 + k_{B,NO}(NO - x_{B,NO})} - B \right)$$

$$f_B(B) = (1 - B)^4$$

## Damage

$$\frac{dD}{dt} = \left( d_{D,B}f_B(B) + k_{D,6} \frac{IL6^{h_{D,6}}}{IL6^{h_{D,6}} + x_{D,6}^{h_{D,6}}} + k_{D,PaO2} \left( 1 - \frac{1}{1 + e^{-h_{D,PaO2}(PaO2 - \beta_{PaO2})}} - \frac{1}{1 + e^{-h_{D,PaO2}(-\beta_{PaO2})}} \right) \right) \left( \frac{x_{D,NO}^2}{NO^2 + x_{D,NO}^2} \right) - d_D D$$

## P/F Ratio

$$PF \text{ Ratio} = \frac{P_{a,O_2}}{F_{i,O_2}}$$

## NO and Precursors

$$\frac{diNOSd}{dt} = k_{iNOS,n}NA + k_{iNOS,m}MA + k_{iNOS,ec} \left( \frac{TNF^2 x_{iNOS,TNF}^2}{TNF^2 + x_{iNOS,TNF}^2} + k_{iNOS,6} \frac{IL6^2 x_{iNOS,6}^2}{IL6^2 + x_{iNOS,6}^2} \right) \left( \frac{x_{iNOS,10}^2}{IL10^2 + x_{iNOS,10}^2} \right) \left( \frac{x_{iNOS,NO}^{h_{iNOS,NO}}}{IL10^{h_{iNOS,NO}} + x_{iNOS,NO}^{h_{iNOS,NO}}} \right) - d_{iNOSd}iNOSd$$

$$\frac{diNOS}{dt} = k_{iNOS}(iNOSd - iNOS)$$

$$\frac{deNOS}{dt} = k_{eNOS,ec} \left( \frac{x_{eNOS,TNF}}{TNF + x_{eNOS,TNF}} \right) \left( \frac{x_{eNOS,LPS}}{LPS + x_{eNOS,LPS}} \right) - d_{eNOS}eNOS$$

$$\frac{dNO_3}{dt} = k_{NO_3}(NO - NO_3)$$

$$NO = iNOS(1 + k_{NO,ma}(MA + NA)) + eNOS$$

## Endotoxin

$$\frac{dLPS}{dt} = \frac{\text{load}_{LPS}}{\text{infusion duration}_{LPS}} - d_{LPS}LPS$$

## Macrophages

$$\frac{dMR}{dt} = - \left( \left( k_{M,LPS} \frac{LPS^2 x_{M,LPS}^2}{LPS^2 + x_{M,LPS}^2} + k_{M,D} \frac{D^{h_{M,D}}}{D^{h_{M,D}} + x_{M,D}^{h_{M,D}}} \right) \left( \frac{TNF^2}{TNF^2 + x_{M,TNF}^2} + k_{M,6} \frac{IL6^2}{IL6^2 + x_{M,6}^2} \right) + k_{M,Bf_B}(B) \right) \frac{x_{M,10}^2}{IL10^2 + x_{M,10}^2} MR - d_{MR}(MR - S_M)$$

$$\frac{dMA}{dt} = + \left( \left( k_{M,LPS} \frac{LPS^2 x_{M,LPS}^2}{LPS^2 + x_{M,LPS}^2} + k_{M,D} \frac{D^{h_{M,D}}}{D^{h_{M,D}} + x_{M,D}^{h_{M,D}}} \right) \left( \frac{TNF^2}{TNF^2 + x_{M,TNF}^2} + k_{M,6} \frac{IL6^2}{IL6^2 + x_{M,6}^2} \right) + k_{M,Bf_B}(B) \right) \frac{x_{M,10}^2}{IL10^2 + x_{M,10}^2} MR - k_{B,L,MA}MA - d_{MA}MA$$

$$\frac{dMA_{Lung}}{dt} = k_{B,L,MA}MA - d_{MA}MA_{Lung}$$

## Neutrophils

$$\frac{dNR}{dt} = - \left( k_{N,LPS} \frac{LPS x_{N,LPS}}{LPS + x_{N,LPS}} + k_{N,TNF} \frac{TNF^2 x_{N,TNF}^2}{TNF^2 + x_{N,TNF}^2} + k_{N,6} \frac{IL6^2 x_{N,6}^2}{IL6^2 + x_{N,6}^2} + k_{N,Bf_B}(B) + k_{N,D} \frac{D^2 x_{N,D}^2}{D^2 + x_{N,D}^2} \right) \left( \frac{x_{N,10}^2}{IL10^2 + x_{N,10}^2} \right) NR - d_{NR}(NR - S_N)$$

$$\frac{dNA}{dt} = + \left( k_{N,LPS} \frac{LPS x_{N,LPS}}{LPS + x_{N,LPS}} + k_{N,TNF} \frac{TNF^2 x_{N,TNF}^2}{TNF^2 + x_{N,TNF}^2} + k_{N,6} \frac{IL6^2 x_{N,6}^2}{IL6^2 + x_{N,6}^2} + k_{N,Bf_B}(B) + k_{N,D} \frac{D^2 x_{N,D}^2}{D^2 + x_{N,D}^2} \right) \left( \frac{x_{N,10}^2}{IL10^2 + x_{N,10}^2} \right) NR - k_{B,L,NA}NA - d_{NR}NA$$

$$\frac{dNA_{Lung}}{dt} = k_{B,L,NA}NA - d_{NA}NA_{Lung}$$

## Lung Epithelial Cells

$$\frac{dECR}{dt} = - \left( k_{EC,LPS} \frac{LPS x_{EC,LPS}}{LPS + x_{EC,LPS}} + k_{EC,TNF} \frac{TNF^2 x_{EC,TNF}^2}{TNF^2 + x_{EC,TNF}^2} + k_{EC,6} \frac{IL6^2 x_{EC,6}^2}{IL6^2 + x_{EC,6}^2} + k_{EC,Bf_B}(B) + k_{EC,D} \frac{D^2 x_{EC,D}^2}{D^2 + x_{EC,D}^2} \right) \left( \frac{x_{EC,10}^2}{IL10^2 + x_{EC,10}^2} \right) ECR - d_{ECR}(ECR - S_{EC})$$

$$\frac{dECA}{dt} = + \left( k_{EC,LPS} \frac{LPS x_{EC,LPS}}{LPS + x_{EC,LPS}} + k_{EC,TNF} \frac{TNF^2 x_{EC,TNF}^2}{TNF^2 + x_{EC,TNF}^2} + k_{EC,6} \frac{IL6^2 x_{EC,6}^2}{IL6^2 + x_{EC,6}^2} + k_{EC,Bf_B}(B) + k_{EC,D} \frac{D^2 x_{EC,D}^2}{D^2 + x_{EC,D}^2} \right) \left( \frac{x_{EC,10}^2}{IL10^2 + x_{EC,10}^2} \right) ECR - d_{ECA}ECA$$

## Cytokines

$$V_B \frac{dTNF}{dt} = (k_{N,TNF}NA + k_{M,TNF}MA) \left( \frac{x_{TNF,10}^{h_{TNF,10}}}{IL10^{h_{TNF,10}} + x_{TNF,10}^{h_{TNF,10}}} \right) \left( \frac{x_{TNF,6}^{h_{TNF,6}}}{IL6^{h_{TNF,6}} + x_{TNF,6}^{h_{TNF,6}}} \right) + Q_{lymph}TNF_{inter} - d_{TNF}TNF$$

$$V_B \frac{dIL1}{dt} = (k_{N,1}NA + k_{M,1}MA) \left( k_{1,TNF} \frac{TNF^{h_{1,TNF}}}{TNF^{h_{1,TNF}} + x_{1,TNF}^{h_{1,TNF}}} + k_{1,NO} \frac{NO^2}{NO^2 + x_{1,NO}^2} + k_{1,HM} \frac{HM^{h_{1,HM}}}{HM^{h_{1,HM}} + x_{1,HM}^{h_{1,HM}}} \right) \left( \frac{x_{1,10}^{h_{1,10}}}{IL10^{h_{1,10}} + x_{1,10}^{h_{1,10}}} \right) \left( \frac{x_{1,6}^{h_{1,6}}}{IL6^{h_{1,6}} + x_{1,6}^{h_{1,6}}} \right) + Q_{lymph}IL1_{inter} - d_{IL1}IL1$$

$$V_B \frac{dIL6}{dt} = (k_{6,N}NA + MA) \left( k_{6,M} + k_{6,TNF} \frac{TNF^{h_{6,TNF}}}{TNF^{h_{6,TNF}} + x_{6,TNF}^{h_{6,TNF}}} + \frac{IL1^{h_{6,1}}}{IL1^{h_{6,1}} + x_{6,1}^{h_{6,1}}} + k_{6,NO} \frac{NO^2}{NO^2 + x_{6,NO}^2} + k_{6,HM} \frac{HM^{h_{6,HM}}}{HM^{h_{6,HM}} + x_{6,HM}^{h_{6,HM}}} \right) \left( \frac{x_{6,10}^{h_{6,10}}}{IL10^{h_{6,10}} + x_{6,10}^{h_{6,10}}} \right) \left( \frac{x_{6,6}^{h_{6,6}}}{IL6^{h_{6,6}} + x_{6,6}^{h_{6,6}}} \right) + Q_{lymph}IL6_{inter} - d_{IL6}IL6$$

$$V_B \frac{dIL10}{dt} = (k_{10,N}NA + MA) \left( k_{10,M} + k_{10,TNF} \frac{TNF^{h_{10,TNF}}}{TNF^{h_{10,TNF}} + x_{10,TNF}^{h_{10,TNF}}} + k_{10,6} \frac{IL6^{h_{10,6}}}{IL6^{h_{10,6}} + x_{10,6}^{h_{10,6}}} + k_{10,HM} \frac{HM^{h_{10,HM}}}{HM^{h_{10,HM}} + x_{10,HM}^{h_{10,HM}}} \right) \left( (1 - k_{10R}) \frac{x_{10,12}^{h_{10,12}}}{IL12^{h_{10,12}} + x_{10,12}^{h_{10,12}}} + k_{10R} \right) + Q_{lymph}IL10_{inter} - d_{IL10}IL10$$

$$V_B \frac{dIL12}{dt} = \left( k_{12,M}MA \frac{x_{12,10}^2}{IL10^2 + x_{12,10}^2} \right) + Q_{lymph}IL12_{inter} - d_{IL12}IL12$$

$$V_B \frac{dHMGB1}{dt} = (k_{HM,N}NA + k_{HM,M}MA) \left( \frac{x_{HM,10}^{h_{HM,10}}}{IL10^{h_{HM,10}} + x_{HM,10}^{h_{HM,10}}} \right) \left( \frac{x_{HM,6}^{h_{HM,6}}}{IL6^{h_{HM,6}} + x_{HM,6}^{h_{HM,6}}} \right) + Q_{lymph}HMGB1_{inter} - d_{HM}HMGB1$$

$$V_{inter} \frac{dX_{inter}}{dt} = Q_{lymph}(X - X_{inter})$$

where  $X = \{TNF, IL1, IL6, IL10, IL12, HMGB1\}$

### Initial Conditions

| Analyte                    | IC Value               |
|----------------------------|------------------------|
| B – Mean Arterial Pressure | 1.0 (normalized)       |
| D – Damage                 | 0.0                    |
| PalvO2                     | 104                    |
| PaO2                       | ~95 (pig dependent)    |
| Cytokines                  | 0.0                    |
| LPS                        | 0.0                    |
| Resting Cells              | 1.0 (normalized)       |
| Active Cells               | 0.0                    |
| iNOS                       | 0.0                    |
| iNOSd                      | 0.0                    |
| eNOS                       | ~0.015 (pig dependent) |
| NO3                        | ~0.015 (pig dependent) |
